# Supplementary material
Source: HighWire-hosted journal article supplement (https://tsaco.bmj.com/content/8/1/e001050)
Supplement: inline-supplementary-material-1 [file inline-supplementary-material-1.pdf]

**Open versus percutaneous tube thoracostomy with and without thoracic lavage for traumatic hemothorax: A novel randomized controlled simulation trial**

**Supplemental Content**

Nathaniel R. McLauchlan SM (ORCID 0000-0001-6749-5288)<sup>1</sup>, Noah M. Igra BS<sup>2</sup>, Lydia T. Fisher BA<sup>1</sup>, James P. Byrne MD PhD<sup>3</sup>, Carl A. Beyer MD (ORCID 0000-0002-9785-8526)<sup>1</sup>, Zhi Geng MD<sup>1</sup>, Daniela Schmulevich MCM (ORCID 0000-0002-6069-9197)<sup>1</sup>, Martha M. Brinson BA<sup>1</sup>, Ryan P. Dumas MD<sup>4</sup>, Daniel N. Holena MD<sup>5</sup>, Allyson M. Hynes MD [ORCID 0000-0001-8037-2290]<sup>6</sup>, Claire B. Rosen MD<sup>1</sup>, Amit N. Shah MD<sup>7</sup>, Michael A. Vella MD<sup>8</sup>, Jeremy W. Cannon MD SM (ORCID 0000-0002-2969-9316)<sup>1,9</sup>

<sup>1</sup> Division of Traumatology, Surgical Critical Care, and Emergency Surgery, Department of Surgery, Perelman School of Medicine at the University of Pennsylvania, Philadelphia, PA

<sup>2</sup> Tel Aviv University Sackler School of Medicine, Tel Aviv, Israel

<sup>3</sup> Department of Surgery, Johns Hopkins University, Baltimore, MD, USA

<sup>4</sup> Department of Surgery, University of Texas Southwestern Medical Center, Dallas, TX, USA

<sup>5</sup> Division of Trauma and Acute Care Surgery, Department of Surgery, Medical College of Wisconsin, Milwaukee, WI, USA

<sup>6</sup> The University of New Mexico School of Medicine, Albuquerque, NM, USA

<sup>7</sup> InnoVital Systems Inc, Calverton, MD, USA

<sup>8</sup> Department of Surgery, University of Rochester Medical Center, Rochester, NY, USA

<sup>9</sup> Department of Surgery, F. Edward Hébert School of Medicine at the Uniformed Services University, Bethesda, MD, USA

**Corresponding Author:**

Jeremy W. Cannon, MD, SM, FACS

Division of Traumatology, Surgical Critical Care & Emergency Surgery

51 N. 39<sup>th</sup> Street

Medical Office Building, Suite 120

Philadelphia, PA 19104

jeremy.cannon@penmedicine.upenn.edu

ORCID 0000-0002-2969-9316

Telephone: 215-662-7320

Fax: 215-243-4605

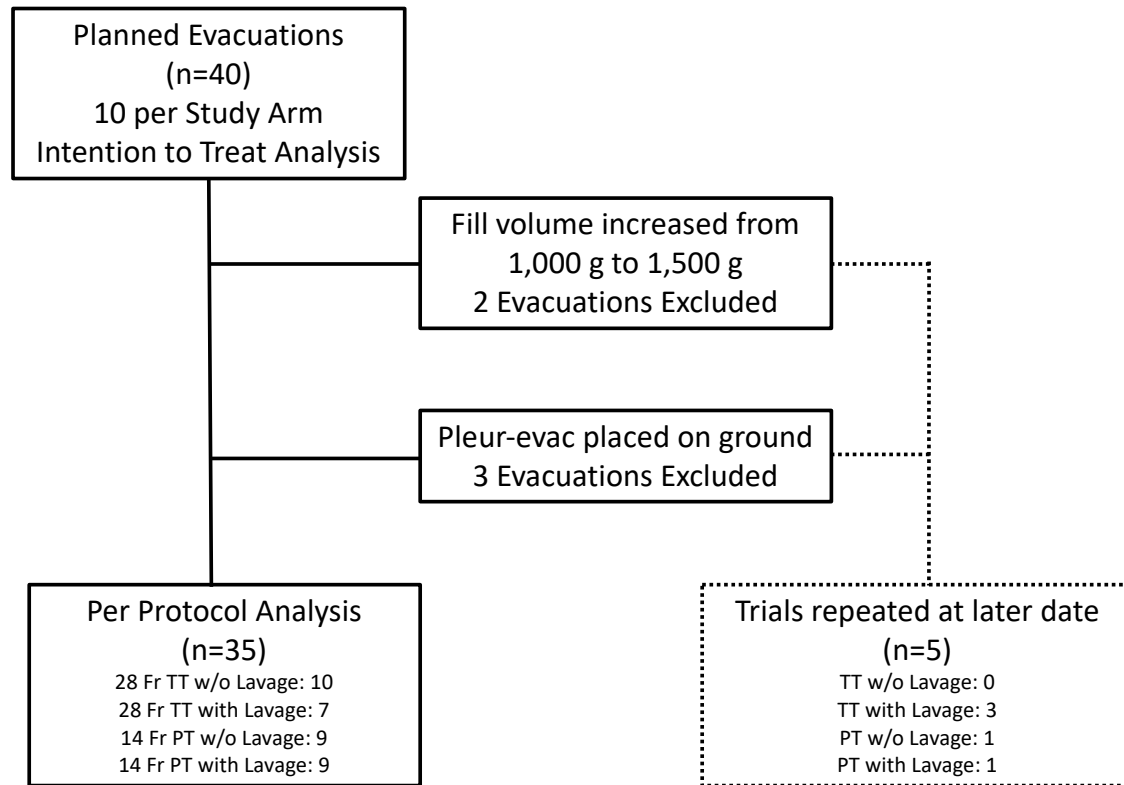

**Supplemental Figure 1.** Study Flow Diagram

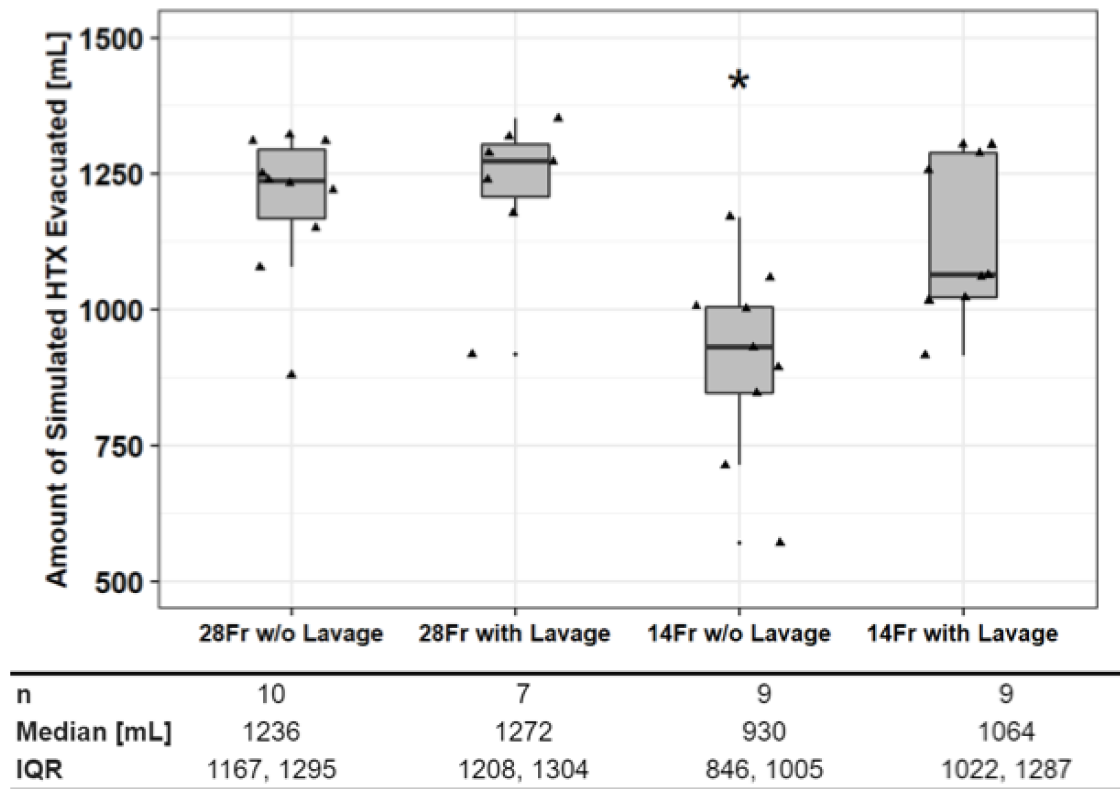

**Supplemental Figure 2.** Per protocol analysis of the original 35 trials (5 trials with procedural deviations excluded). \* $p < 0.05$  compared to all others by Wilcoxon rank sum post-hoc test.

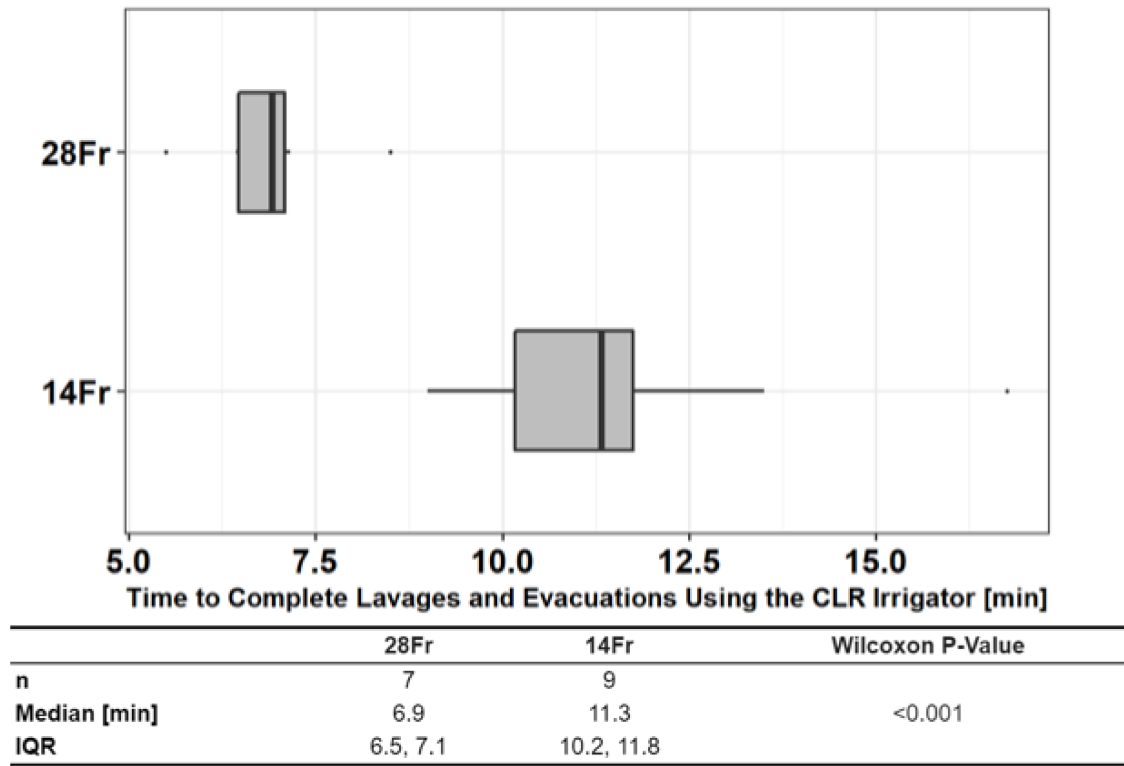

**Supplemental Figure 3.** Per protocol analysis of the original 35 trials (5 trials with procedural deviations excluded).

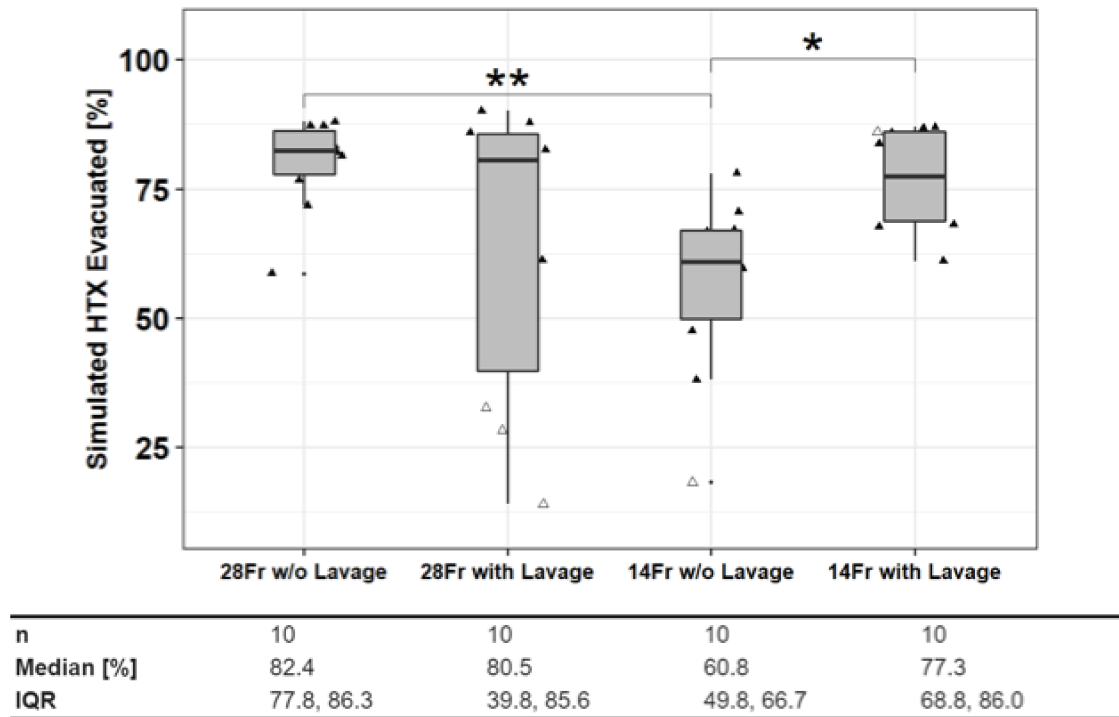

**Supplemental Figure 4.** Intention to treat analysis of all 40 original trials (including 5 trials with procedural deviations). Open triangles signify trials with procedural deviation. \* $p < 0.01$ , \*\* $p < 0.001$

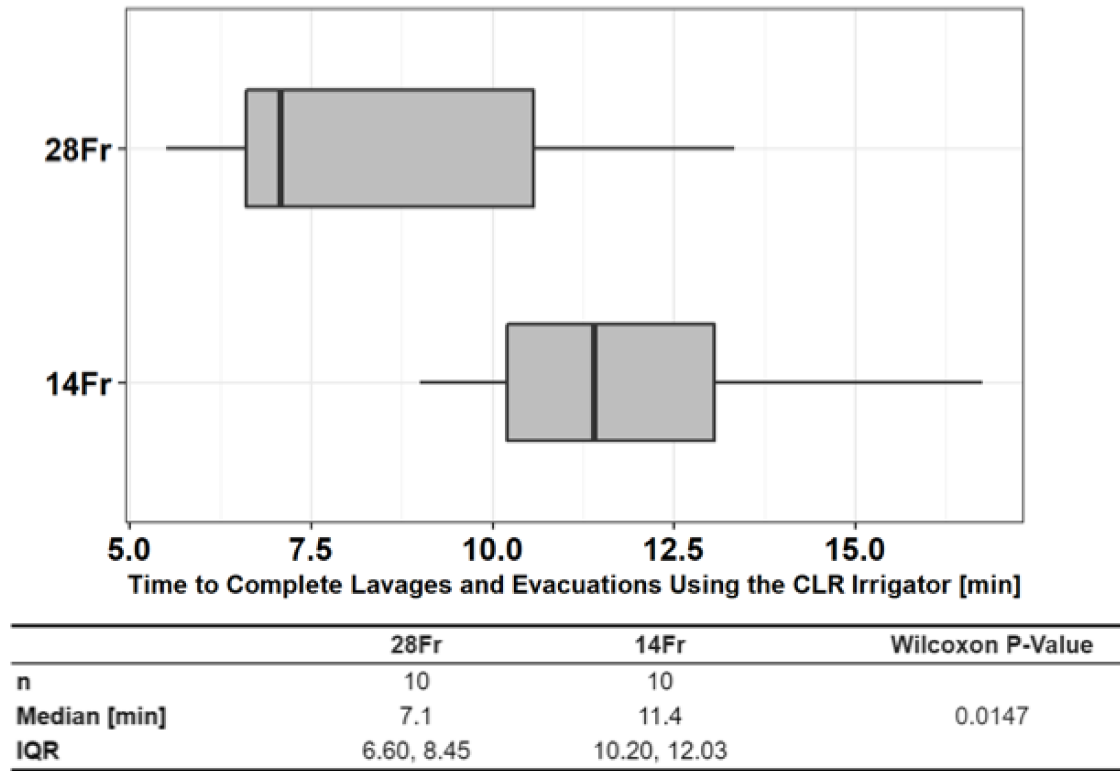

**Supplemental Figure 5.** Intention to treat analysis of all 40 original trials (including 5 trials with procedural deviations).
